# Supplementary material for: Reduced recognition of facial emotional expressions in global burnout and burnout depersonalization in healthcare providers
Source: PeerJ. 2021 Jan 13;9:e10610. doi: 10.7717/peerj.10610 (PMC7811292; doi:10.7717/peerj.10610)
Supplement: Supplemental Information 1 [file peerj-09-10610-s001.xlsx]

## Sheet: dataset
ID	Gender	Experience	Age	EmotionalExhaustiongroup	DepersonalizationGroup	BurnoutGroup	AverageCortisol	%AccuracyHappy	%AccuracyAnger	%AccuracyFear	%AccuracySad	Speed	%AllNegativeAsPositiveDep
1	F	14	41	H	H	Y		94.4444	88.8889	66.6667	38.8889	5110.92	31.4815
2	M	31	46	L	H	N		94.4444	61.1111	50	27.7778	3570.83	31.4815
3	F	33	56	H	L	N		100	77.7778	55.5556	50	5098.42	33.3333
4	F	38	58	L	L	N		66.6667	33.3333	44.4444	38.8889	2638.99	22.2222
5	F	32	56	L	L	N		100	88.8889	94.4444	94.4444	5026.78	33.3333
6	F	21	45	H	H	Y	0.015744	94.4444	27.7778	66.6667	77.7778	7095.56	31.4815
7	F	20	40	L	L	N	0.0534585	100	77.7778	77.7778	100	4470.54	33.3333
8	M	23	56	L	L	N	0.030173	100	61.1111	66.6667	88.8889	5492.03	33.3333
9	F	24	43	H	H	Y	0.122785	88.8889	44.4444	50	44.4444	5408.1	29.6296
10	F	21	41	L	H	N	0.38598	100	77.7778	72.2222	72.2222	6985.69	33.3333
11	F	5	29	L	H	N		100	61.1111	66.6667	55.5556	5408.82	33.3333
12	F	20	40	L	L	N		100	77.7778	77.7778	100	4470.54	33.3333
13	F	25	47	L	H	N		100	66.6667	66.6667	83.3333	8227.31	33.3333
14	F	37	57	L	H	N		100	72.2222	66.6667	83.3333	8086.11	33.3333
15	F	37	55	L	L	N	0.061595	100	83.3333	83.3333	77.7778	5008.74	33.3333
16	F	25	44	H	L	N		94.4444	44.4444	27.7778	27.7778	4435.24	31.4815
17	F	20	45	H	H	Y	0.0459	100	50	50	66.6667	4559.57	33.3333
18	F	17	41	L	H	N	0.07013	94.4444	55.5556	72.2222	61.1111	6408.09	31.4815
19	M	27	43	H	H	Y		27.7778	16.6667	27.7778	44.4444	1615.3	9.25926
20	F	6	54	L	L	N	0.12822	88.8889	77.7778	61.1111	100	5406.99	29.6296
21	F	6	30	L	L	N		100	66.6667	33.3333	44.4444	2405.95	33.3333
22	F	25	50	L	L	N	0.02042	83.3333	72.2222	100	100	5141.08	27.7778
23	F	12	39	H	H	Y	0.035537	88.8889	22.2222	16.6667	44.4444	2802.39	29.6296
24	F	23	47	H	H	Y		94.4444	66.6667	61.1111	88.8889	3626.78	31.4815
25	F	27	50	H	H	Y		100	33.3333	66.6667	50	6031.48	33.3333
26	F	5	52	L	L	N		100	83.3333	72.2222	83.3333	5765.01	33.3333
27	F	28	51	L	L	N	0.058503	100	83.3333	83.3333	83.3333	5311.83	33.3333
28	F	8	31	H	H	Y	0.39778	100	55.5556	61.1111	55.5556	3659	33.3333
29	F	30	50	H	H	Y		100	66.6667	50	66.6667	5854.11	33.3333
30	F	10	32	L	H	N	0.040569	94.4444	72.2222	61.1111	61.1111	4903.61	31.4815
31	F	1	26	L	L	N	0.0512275	44.4444	72.2222	38.8889	55.5556	2553.91	14.8148
32	F	40	57	H	L	N		33.3333	44.4444	22.2222	50	1538.83	11.1111
33	F	10	35	H	H	Y	0.135775	88.8889	38.8889	38.8889	66.6667	3257.14	29.6296
34	F	29	51	H	H	Y	0.102544	94.4444	66.6667	61.1111	77.7778	4560.84	31.4815
35	F	35	56	L	L	N	0.140365	94.4444	72.2222	72.2222	88.8889	7449.67	31.4815
36	F	22	51	L	H	N		100	72.2222	61.1111	83.3333	7694.16	33.3333
37	F	30	50	L	H	N		88.8889	66.6667	55.5556	55.5556	6560.9	29.6296
38	F	20	37	L	L	N	0.10359	100	88.8889	77.7778	94.4444	5279.36	33.3333
39	F	28	46	H	L	N		61.1111	27.7778	27.7778	33.3333	1305.06	20.3704
40	F	1	28	H	L	N	0.054562	94.4444	83.3333	77.7778	72.2222	4541.17	31.4815
41	F	30	52	H	L	N		100	88.8889	83.3333	88.8889	6731.52	33.3333
42	F	11	32	H	L	N	0.185375	100	83.3333	83.3333	88.8889	3985.2	33.3333
43	F	1	25	L	L	N	0.084386	100	88.8889	72.2222	94.4444	5504.2	33.3333
44	F	26	50	L	H	N		100	83.3333	66.6667	61.1111	4893.75	33.3333
45	M	3	26	H	H	Y	0.122665	100	72.2222	61.1111	72.2222	4593.57	33.3333
46	M	3	26	H	H	Y		100	72.2222	61.1111	72.2222	4593.57	33.3333
47	F	10	33	H	H	Y	0.0234415	100	61.1111	44.4444	83.3333	5886.28	33.3333
48	F	25	47	H	L	N		55.5556	16.6667	33.3333	83.3333	3461.04	18.5185
49	F	23	46	H	L	N		61.1111	72.2222	33.3333	16.6667	4546.36	20.3704
50	F	28	50	L	L	N		55.5556	55.5556	38.8889	38.8889	2045.6	18.5185
51	F	22	50	L	L	N		88.8889	83.3333	72.2222	66.6667	4256.57	29.6296
52	M	32	51	H	L	N	0.0941465	94.4444	88.8889	72.2222	100	6803.62	31.4815
53	F	23	53	H	H	Y	0.103805	100	83.3333	66.6667	55.5556	5452.76	33.3333
54	M	13	40	H	H	Y	0.171795	100	61.1111	16.6667	72.2222	3818.02	33.3333
55	M	6	41	H	L	N		100	88.8889	83.3333	66.6667	6780.65	33.3333
56	F	36	52	L	L	N		100	77.7778	88.8889	83.3333	6089.9	33.3333
57	F	34	54	L	L	N		16.6667	33.3333	33.3333	16.6667	2004.98	5.55556
58	F	30	50	L	H	N	0.13729	83.3333	66.6667	66.6667	55.5556	6560.9	27.7778
59	F	23	53	H	H	Y		100	83.3333	66.6667	55.5556	5452.76	33.3333
60	F	25	47	H	L	N	0.022665	55.5556	16.6667	27.7778	83.3333	3461.04	18.5185
61	F	23	46	H	H	Y		88.8889	22.2222	38.8889	33.3333	4611.03	29.6296
62	F	20	47	L	L	N		100	77.7778	88.8889	55.5556	5276.09	33.3333
63	F	22	45	L	H	N	0.134715	88.8889	27.7778	16.6667	66.6667	2398.34	29.6296
64	F	38	58	L	L	N		77.7778	27.7778	33.3333	38.8889	2792.97	25.9259
65	F	17	41	L	L	N		94.4444	77.7778	61.1111	77.7778	4011.21	31.4815
66	F	2	26	H	H	Y		100	88.8889	55.5556	72.2222	4969.73	33.3333
67	F	12	39	L	L	N		100	72.2222	61.1111	77.7778	4071.22	33.3333
68	F	23	44	H	L	N	0.0306245	100	88.8889	77.7778	94.4444	4159.7	33.3333
69	F	33	53	H	H	Y	0.01709	88.8889	38.8889	50	55.5556	3377.63	29.6296
70	F	2	27	L	H	N	0.129265	88.8889	27.7778	11.1111	16.6667	2395.69	29.6296
71	F	27	47	L	H	N	0.114615	100	55.5556	38.8889	27.7778	3370.15	33.3333
72	F	5	28	L	H	N		88.8889	61.1111	66.6667	77.7778	5923.27	29.6296
73	F	28	48	L	L	N		94.4444	66.6667	61.1111	77.7778	3509.29	31.4815
74	F	23	41	H	H	Y	0.139055	100	27.7778	50	22.2222	2803.68	33.3333
75	F	37	56	L	L	N		11.1111	27.7778	33.3333	38.8889	3911.37	3.7037
76	F	27	48	L	H	N	0.16368	100	55.5556	44.4444	77.7778	6750.32	33.3333
77	F	17	54	H	L	N	0.0522155	100	72.2222	66.6667	77.7778	5460.28	33.3333
78	F	35	53	L	H	N	0.0505285	100	66.6667	72.2222	66.6667	4611.53	33.3333
79	F	30	48	H	H	Y	0.03438	94.4444	33.3333	50	72.2222	4460.35	31.4815
80	F	36	58	H	L	N		44.4444	22.2222	38.8889	16.6667	1000.15	14.8148
81	F	26	45	H	L	N		94.4444	72.2222	66.6667	55.5556	3554.72	31.4815
82	F	37	56	L	H	N	0.208795	100	66.6667	66.6667	72.2222	4747.57	33.3333
83	F	27	51	L	L	N		66.6667	55.5556	61.1111	77.7778	4168.58	22.2222
84	F	32	51	H	H	Y	0.041083	100	44.4444	27.7778	33.3333	3112.1	33.3333
85	F	19	42	H	H	Y	0.06857	100	44.4444	50	66.6667	5118.79	33.3333
86	M	20	42	L	H	N	0.116395	100	72.2222	72.2222	61.1111	5554.26	33.3333
87	F	1	22	L	L	N	0.0440815	88.8889	72.2222	66.6667	61.1111	2591.51	29.6296
88	F	19	41	L	L	N	0.0579315	72.2222	50	33.3333	66.6667	3393.99	24.0741
89	F	33	52	L	L	N	0.036015	100	88.8889	100	94.4444	5851.91	33.3333
90	F	28	62	H	H	Y		27.7778	11.1111	33.3333	50	1435.53	9.25926
